# Supplementary material for: Use of Item Response Models in Assessing the Health Literacy Facet Understanding Health Information for Early Childhood Allergy Prevention and Prevention of COVID-19 Infections by Pregnant Women and Mothers of Infants
Source: Atypon-hosted journal article supplement (doi:10.1026/0012-1924/a000298), 2022-09-12
Supplement: 0012-1924_a000298_esm1.pdf [file 0012-1924_a000298_esm1.pdf]

## HELICAP- Lösungsblatt Testheft 1

### Frage 2.1

Frau Jansen möchte ein Fläschchen für Ihr Baby zubereiten. Das Baby ist in der 5. Lebenswoche. Dafür liest sie sich eine Anleitung zur Dosierung und Zubereitung für Säuglingsmilch durch.

#### DOSIERUNG UND ZUBEREITUNG

##### Anfangsmilch von Geburt an

**Dosierung:** Anzahl und Trinkmenge pro Fläschchen variieren individuell. Daher sind die angegebenen Trinkmengen und die Anzahl der Fläschchen pro Tag nur empfohlene Richtwerte. Gestrichen voll fasst ein Messlöffel 4,7 g.

| Alter des Kindes | Flaschenmahlzeiten pro Tag | Trinkfertige Nahrung (ml) | Pro Mahlzeit werden benötigt |            |
|------------------|----------------------------|---------------------------|------------------------------|------------|
|                  |                            |                           | Wasser (ml)                  | Messlöffel |
| 1. Woche         | 5-7                        | 70                        | 60                           | 2          |
| 2. Woche         | 6                          | 100                       | 90                           | 3          |
| 3.-4. Woche      | 5-6                        | 130                       | 120                          | 4          |
| 5.-8. Woche      | 5                          | 170                       | 150                          | 5          |
| 3.+4. Monat      | 4-5                        | 200                       | 180                          | 6          |
| 5. Monat         | 4                          | 230                       | 210                          | 7          |
| 6. Monat         | 3                          | 230                       | 210                          | 7          |
| Nach 6. Monat    | 1-2                        | 230                       | 210                          | 7          |

Bitte geben Sie an, wie viel Wasser (ml) und Messlöffel Frau Jansen benötigt, um ein Fläschchen für Ihr Baby (5. Lebenswoche) zuzubereiten:

Menge an Wasser: \_\_\_\_\_ 150 \_\_\_\_\_ (ml)

Anzahl an Messlöffel pro Mahlzeit: \_\_\_\_\_ 5 \_\_\_\_\_

## Frage 2.2

Das Schaubild zeigt den empfohlenen Ernährungsplan für das 1. Lebensjahr eines Kindes.

Ernährungsplan für das 1. Lebensjahr

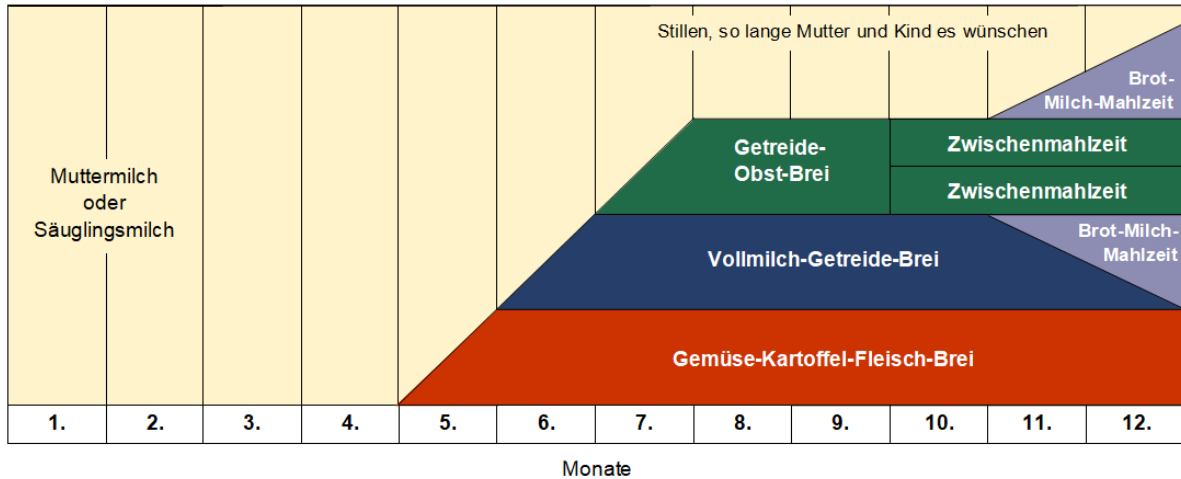

Angenommen eine Mutter möchte sich am Ernährungsplan für das 1. Lebensjahr ihres Kindes orientieren. Sie stellt fest, dass Sie erst im nächsten Monat Getreide-Obst-Brei füttern sollte.

Bitte geben Sie an, wie alt das Kind ist: Das Kind ist im 6. Monat

Welche Aussagen treffen zu, wenn die Mutter das Kind nach dem Ernährungsplan füttern möchte?

|                                                                                           | Trifft zu                           | Trifft nicht zu                     |
|-------------------------------------------------------------------------------------------|-------------------------------------|-------------------------------------|
| Die Mutter hat in diesem Monat begonnen, ihr Kind mit Vollmilch-Getreide-Brei zu füttern. | <input checked="" type="checkbox"/> | <input type="checkbox"/>            |
| Die Mutter sollte das Kind nicht mehr stillen oder Säuglingsmilch geben.                  | <input type="checkbox"/>            | <input checked="" type="checkbox"/> |
| Die Mutter sollte Brot-Milch-Mahlzeiten noch nicht geben.                                 | <input checked="" type="checkbox"/> | <input type="checkbox"/>            |
| Die Mutter sollte Zwischenmahlzeiten geben.                                               | <input type="checkbox"/>            | <input checked="" type="checkbox"/> |

## Frage 2.3

### Sie lesen die folgende Information:

Die erbliche Veranlagung erhöht das Allergierisiko eines Neugeborenen.

- Ist ein Elternteil allergisch, so liegt das familiär bedingte Allergierisiko des Babys bei 20-40 %.
- Ähnlich hoch sind die Zahlen, wenn bereits ein Geschwister allergisch ist: 25-35 %.
- Haben beide Eltern mit Allergien zu kämpfen, steigt die Wahrscheinlichkeit auf 40-60 %.
- Wenn beide Eltern an der gleichen Art von Allergien leiden, liegt das Allergierisiko für das Kind sogar bei 60-80 %.

### Welche der Aussagen treffen zu?

|                                                                                                                                     | Trifft zu             | Trifft nicht zu       |
|-------------------------------------------------------------------------------------------------------------------------------------|-----------------------|-----------------------|
| Wenn nur die Mutter betroffen ist, liegt das Allergierisiko bei maximal 40 %                                                        | <b>X</b>              | <input type="radio"/> |
| Wenn beide Eltern eine unterschiedliche Allergie haben, liegt das Allergierisiko des Kindes bei mindestens 40 %                     | <b>X</b>              | <input type="radio"/> |
| Wenn nur ein Elternteil allergisch ist, ist das maximale Allergierisiko niedriger, als wenn nur ein Geschwisterkind allergisch ist. | <input type="radio"/> | <b>X</b>              |
| Wenn nur die Mutter und das Geschwisterkind betroffen sind, liegt das Allergierisiko bei 45 %.                                      | <input type="radio"/> | <b>X</b>              |

## Frage 2.4

Die beiden Begriffe Lebensmittelunverträglichkeit und Lebensmittelallergie werden von vielen Menschen im Alltag synonym verwendet. Tatsächlich handelt es sich jedoch um zwei verschiedene Erkrankungen.

Die zentralen Unterschiede sind der Tabelle zu entnehmen.

|                             | Lebensmittelallergie                                                                               | Lebensmittelunverträglichkeit                                                                           |
|-----------------------------|----------------------------------------------------------------------------------------------------|---------------------------------------------------------------------------------------------------------|
| <b>Häufigkeit</b>           | Ca. 4% der Säuglinge und Kleinkinder sind betroffen, nimmt mit dem Alter ab                        | Im Säuglings- und Kleinkindalter sehr selten, nimmt mit dem Alter zu                                    |
| <b>Symptome</b>             | Durchfall, Ausschlag, Schleimhautschwellung, gerötete/juckende Haut, tränende Augen, laufende Nase | Hautreizungen/Jucken, Verdauungsbeschwerden, Atembeschwerden, laufende Nase, Schleimhautschwellungen    |
| <b>Reaktion des Körpers</b> | Immunologischer Mechanismus (Antigen-Antikörper-Reaktion), Reaktion unmittelbar nach Verzehr       | Mangel/Defekt eines bestimmten Proteins, Reaktion verzögert                                             |
| <b>Menge</b>                | Dosisunabhängig, kleinste Mengen können die allergische Reaktion auslösen                          | Dosisabhängig, individuell verschieden wie viel des Nahrungsmittels beschwerdefrei verzehrt werden kann |
| <b>Therapie</b>             | Totaler Verzicht auf das Lebensmittel notwendig                                                    | Reduktion der Verzehrmenge ausreichend                                                                  |

Geben Sie bitte an, ob die Aussagen für eine Allergie, für eine Unverträglichkeit oder für beide Erkrankungen zutreffen.

|                                                                | Lebensmittelallergie | Lebensmittelunverträglichkeit | Beide |
|----------------------------------------------------------------|----------------------|-------------------------------|-------|
| Es handelt sich um eine immunologische Reaktion des Körpers.   | X                    | ○                             | ○     |
| Körperliche Reaktionen treten in der Regel erst verzögert auf. | ○                    | X                             | ○     |
| Kleinste Mengen des Lebensmittels lösen Beschwerden aus.       | X                    | ○                             | ○     |
| Die Erkrankung kommt vermehrt bei Säuglingen vor.              | X                    | ○                             | ○     |

## Frage 2.5

Das Schaubild verdeutlicht den Mechanismus einer allergischen Reaktion.

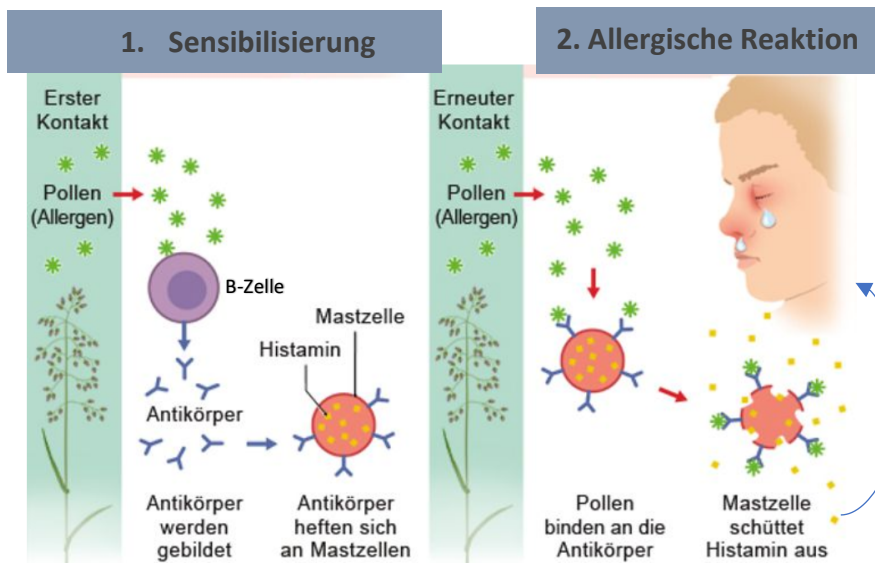

Entwicklung einer Allergie

Geben Sie bitte an, ob die Aussagen zutreffen.

|                                                                                                                   | Trifft zu                           | Trifft nicht zu                     |
|-------------------------------------------------------------------------------------------------------------------|-------------------------------------|-------------------------------------|
| Histamin wird aus den Mastzellen freigesetzt.                                                                     | <input checked="" type="checkbox"/> | <input type="checkbox"/>            |
| Bei der Sensibilisierung bindet das Allergen an die Antikörper.                                                   | <input type="checkbox"/>            | <input checked="" type="checkbox"/> |
| Eine allergische Reaktion wird durch die Ausschüttung von Antigenen verursacht.                                   | <input type="checkbox"/>            | <input checked="" type="checkbox"/> |
| Sobald die Sensibilisierung stattgefunden hat, führt ein erneuter Allergenkontakt zu einer allergischen Reaktion. | <input checked="" type="checkbox"/> | <input type="checkbox"/>            |
| Die Bindung der Pollen an die Antikörper führt zur Ausschüttung von Histamin.                                     | <input checked="" type="checkbox"/> | <input type="checkbox"/>            |

## Frage 2.6

Mit einem Pollenflugkalender wird auf einen Blick ersichtlich, zu welcher Jahreszeit welche Pollen fliegen und wann in etwa mit der stärksten Pollenbelastung (dicker Balken) zu rechnen ist.

Sie können damit Allergiesymptome wie z. B. Schnupfen, Augenjucken etc. auf einen möglichen Auslöser zurückführen.

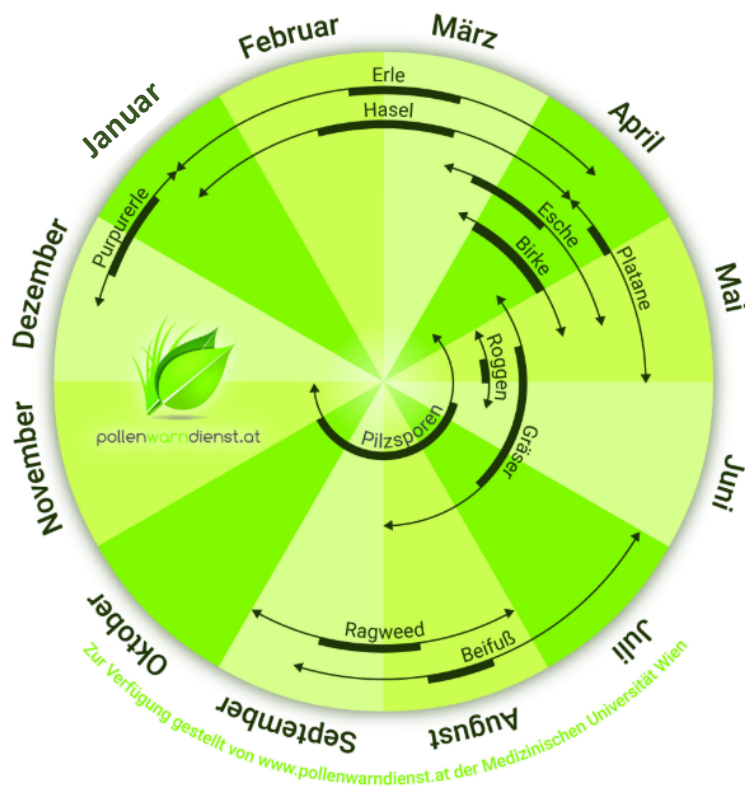

Geben Sie mit Hilfe des Pollenkalenders bitte an, ob die nachfolgenden Aussagen zutreffen.

|                                                                                                                | Trifft zu                        | Trifft nicht zu                  |
|----------------------------------------------------------------------------------------------------------------|----------------------------------|----------------------------------|
| Liegt der "Höhepunkt" der Allergiesymptome im Juni, ist eine Allergie gegen Beifuß wahrscheinlich.             | <input type="radio"/>            | <input checked="" type="radio"/> |
| Birkenpollen verursachen besonders im Mai allergische Beschwerden.                                             | <input type="radio"/>            | <input checked="" type="radio"/> |
| Zeigen sich Allergiesymptome sehr früh im Jahr, kommen am ehesten Hasel- und Erlenpollen als Auslöser infrage. | <input checked="" type="radio"/> | <input type="radio"/>            |
| Haselpollen fliegen länger als Pilzsporen.                                                                     | <input type="radio"/>            | <input checked="" type="radio"/> |

## Frage 2.7

Das Diagramm zeigt die Gewichtszunahme von normalgewichtigen Frauen während der Schwangerschaft.

- Die grüne Linie zeigt an, wie viel Gewicht die Frauen während der Schwangerschaft mindestens zunehmen sollten.
- Die blaue Linie zeigt an, wie viel Gewicht Frauen während der Schwangerschaft im Durchschnitt zunehmen.
- Die rote Linie zeigt an, wie viel Gewicht die Frauen während der Schwangerschaft maximal zunehmen sollten.

**Gewichtszunahme in der Schwangerschaft** bei normalgewichtigen Frauen mit einem BMI zwischen 18,5 und unter 25

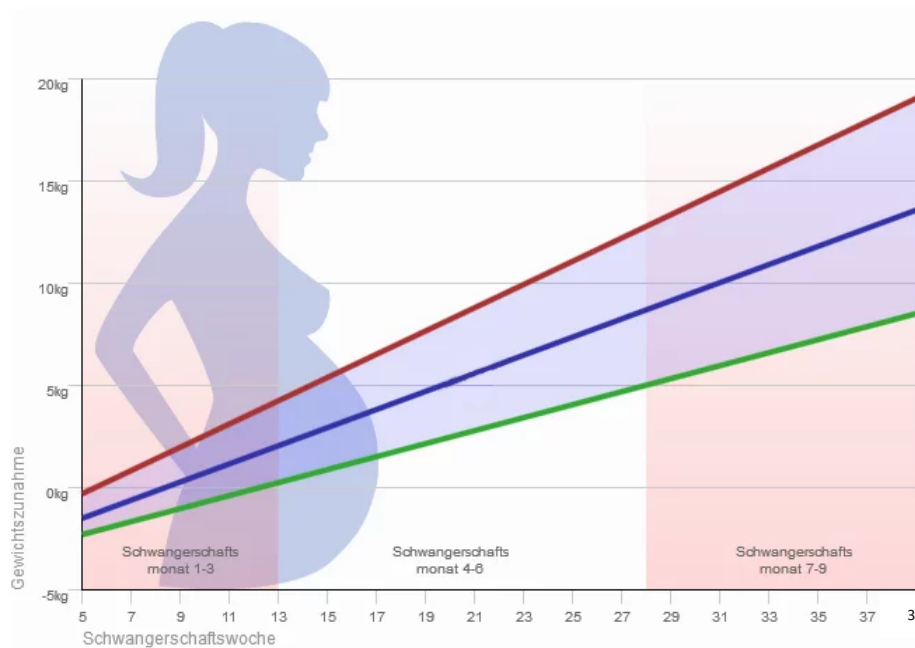

Welche Aussagen treffen auf normalgewichtige Frauen zu?

|                                                                                                                          | Trifft zu                        | Trifft nicht zu                  |
|--------------------------------------------------------------------------------------------------------------------------|----------------------------------|----------------------------------|
| Bereits in der 5. Schwangerschaftswoche erhöht sich das Körpergewicht bei normalgewichtigen Frauen.                      | <input type="radio"/>            | <input checked="" type="radio"/> |
| Am Ende des 3. Monats beträgt die Gewichtszunahme durchschnittlich ca. 11 kg.                                            | <input type="radio"/>            | <input checked="" type="radio"/> |
| Spätestens in der 13. Schwangerschaftswoche sollte das Ausgangsgewicht von vor der Schwangerschaft wieder erreicht sein. | <input checked="" type="radio"/> | <input type="radio"/>            |
| Bis zu Beginn der 39. Schwangerschaftswoche sollten maximal ca. 19 Gewicht zugenommen werden.                            | <input checked="" type="radio"/> | <input type="radio"/>            |

## Frage 2.8

Die Tabelle zeigt, wie viele Nährwerte in einer Packung Fruchtmas „Apfel-Pfirsich-Mango“ enthalten sind.

| Durchschnittliche Nährwerte   | Pro 100 g |
|-------------------------------|-----------|
| Energie kJ/kcal               | 247/58    |
| Fett                          | < 0,5 g   |
| - davon gesättigte Fettsäuren | < 0,1 g   |
| Kohlenhydrate                 | 11,0 g    |
| - davon Zucker                | 10,0 g    |
| Eiweiß                        | < 0,5 g   |
| Salz                          | < 0,01 g  |
| Natrium                       | < 0,01 g  |

Kinder sollten pro Tag maximal 25 Gramm (g) Zucker zu sich nehmen.

**Wie viel Gramm dieses Lebensmittels dürften Sie Ihrem Kind maximal füttern, um den Grenzwert von 25 g Zucker nicht zu überschreiten?**

Maximale Menge: \_\_\_\_\_250\_\_\_\_\_g



## Frage 2.9

Sie sehen hier Perzentilkurven von Jungen im Alter von bis zu 21 Monaten. Sie sehen drei Kurven. Hierdurch können Sie ablesen, ob sich Ihr Kind, was das Gewicht angeht, normal und gesund entwickelt.

- Die 50er Perzentilkurve (P50) stellt dabei den Durchschnittswert dar. Die Hälfte der gleichaltrigen Kinder ist schwerer, die Hälfte ist leichter. Doch auch alle Werte zwischen den beiden anderen Kurven P3 und P97 liegen im akzeptablen Normbereich.
- Liegen die Werte Ihres Kindes auf dem dritten Perzentil (P3), sind nur drei Prozent der Gleichaltrigen noch leichter.
- Liegen seine Werte jedoch auf der 97. Perzentilkurve (P97), ist es umgekehrt: 97 Prozent der Gleichaltrigen sind leichter als Ihr Kind.

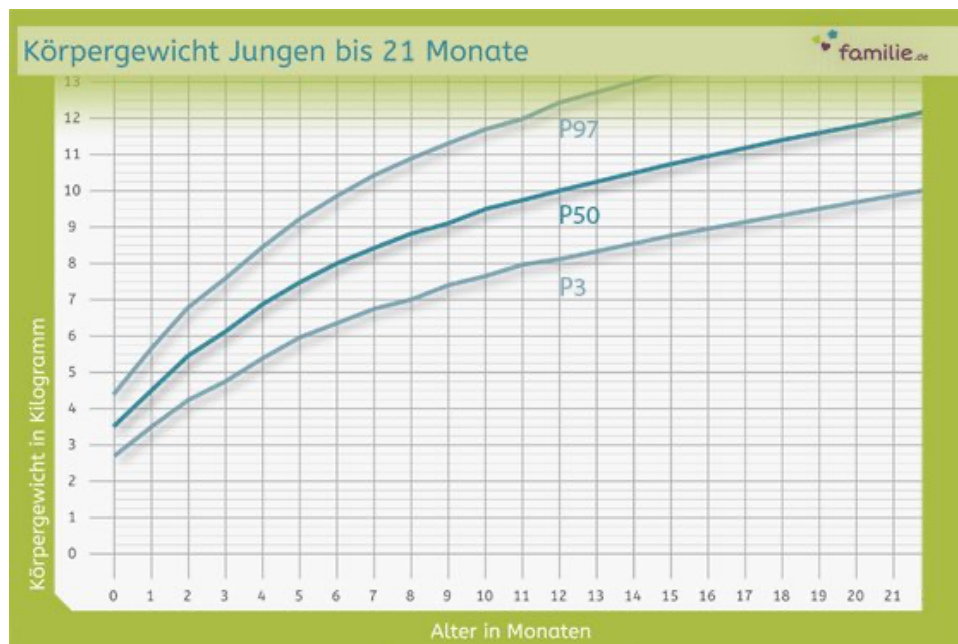

Tom ist 6 Monate alt und wiegt acht Kilogramm.

Bitte kreuzen Sie die richtige Antwort an.

|               | Auf der P3            | Zwischen der P3 und der P50 | Auf der P50                      | Auf der P97           |
|---------------|-----------------------|-----------------------------|----------------------------------|-----------------------|
| Tom liegt ... | <input type="radio"/> | <input type="radio"/>       | <input checked="" type="radio"/> | <input type="radio"/> |

## Frage 2.10

Das Schaubild zeigt den empfohlenen Ernährungsplan für das 1. Lebensjahr eines Kindes.

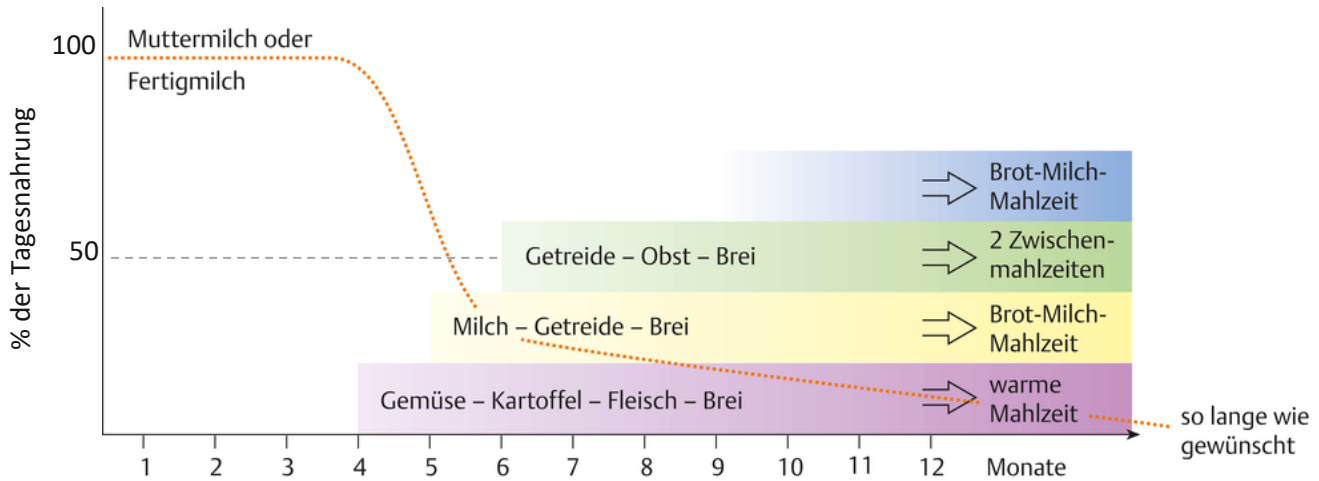

Welche Aussagen treffen zu, wenn man sich an den Ernährungsplan hält.

|                                                                                                                                  | Trifft zu             | Trifft nicht zu       |
|----------------------------------------------------------------------------------------------------------------------------------|-----------------------|-----------------------|
| Bei Kindern im Alter von 3 Monaten macht Mutter- oder Fertigmilch 100 % der Tagesnahrung aus.                                    | <b>X</b>              | <input type="radio"/> |
| Bei Kindern im Alter von 6 Monaten sollte mehr als die Hälfte der Nahrungsmenge durch Mutter- oder Fertigmilch zugeführt werden. | <input type="radio"/> | <b>X</b>              |
| Bei Kindern im Alter von 12 Monaten sollte Mutter- oder Fertigmilch nicht mehr zur Tagesnahrung des Kindes beitragen.            | <input type="radio"/> | <b>X</b>              |
| Kinder ab 12 Monaten sollten zwei Brot-Milch-Mahlzeiten essen.                                                                   | <b>X</b>              | <input type="radio"/> |
| Wenn Getreide-Obst-Brei gegeben wird, sollte Muttermilch / Fertigmilch weniger als die Hälfte der Tagesnahrung ausmachen.        | <b>X</b>              | <input type="radio"/> |

## Frage 2.11

Bei vielen Allergikern tritt der allergische Marsch auf.

Damit bezeichnet man das Phänomen, dass bestimmte Menschen bereits im Säuglingsalter eine Allergie entwickeln und im Laufe des Lebens weitere Allergien folgen.

Das Schaubild stellt den typischen Verlauf des allergischen Marsches dar.

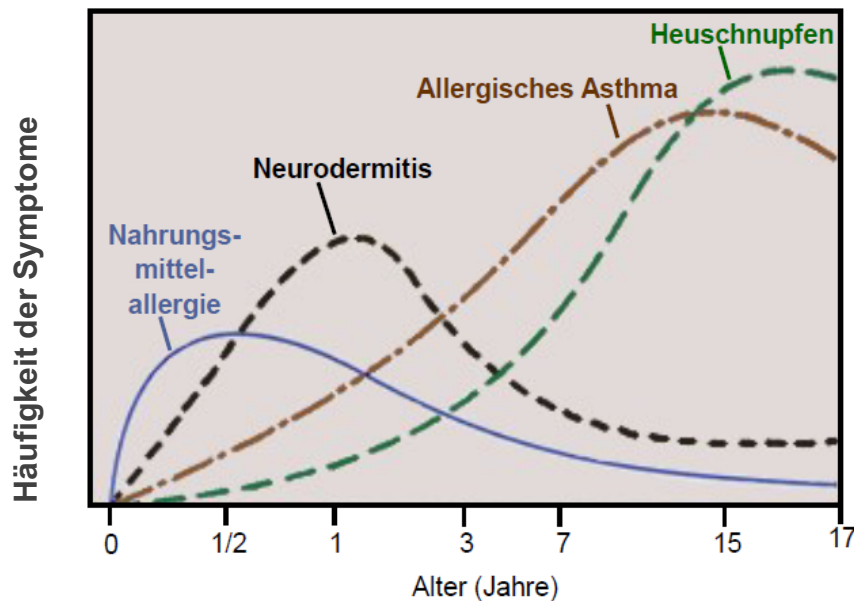

Geben Sie bitte anhand der Abbildung an, ob die Aussagen zutreffen.

|                                                                                                                                          | Trifft zu                        | Trifft nicht zu                  |
|------------------------------------------------------------------------------------------------------------------------------------------|----------------------------------|----------------------------------|
| In den ersten sechs Lebensmonaten treten vor allem allergisches Asthma und Neurodermitis auf.                                            | <input type="radio"/>            | <input checked="" type="radio"/> |
| Der allergische Marsch setzt sich zwischen dem 7. bis 15. Lebensjahr als allergisches Asthma und Heuschnupfen fort.                      | <input checked="" type="radio"/> | <input type="radio"/>            |
| Im Alter von 3 Jahren treten allergisches Asthma und Nahrungsmittelallergie annähernd gleich häufig auf.                                 | <input type="radio"/>            | <input checked="" type="radio"/> |
| Wenn ein Kind mit einem Jahr eine Nahrungsmittelallergie hat, deutete dies daraufhin, dass ein erhöhtes Risiko für Heuschnupfen besteht. | <input checked="" type="radio"/> | <input type="radio"/>            |

## Frage 2.12

Bei Neurodermitis liegt eine gestörte Hautbarriere vor.

Das Schaubild zeigt den Unterschied von gestörter und gesunder Hautbarriere.

Aufbau gestörte und gesunde Hautbarriere

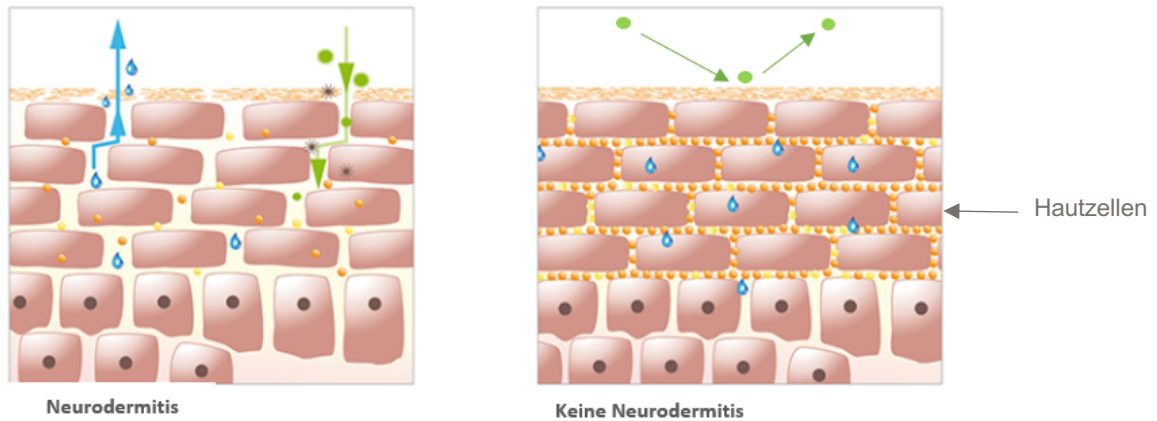

**Legende**

- Säureschutzmantel
- Fremdstoffe (z.B. Krankheitserreger, Allergene)
- Hautfette
- Feuchtigkeit (Wasser)

Beantworten Sie bitte nachfolgende Fragen.

|                                                                           | Säureschutzmantel                | Fremdstoffe                      | Hautfette                        | Feuchtigkeit                     |
|---------------------------------------------------------------------------|----------------------------------|----------------------------------|----------------------------------|----------------------------------|
| Was entweicht bei einer gestörten Hautbarriere?                           | <input type="radio"/>            | <input type="radio"/>            | <input type="radio"/>            | <input checked="" type="radio"/> |
| Was schützt die Haut vor dem Eindringen von Fremdstoffen?                 | <input checked="" type="radio"/> | <input type="radio"/>            | <input type="radio"/>            | <input type="radio"/>            |
| Was dringt bei einer gesunden Hautbarriere schlechter in die Haut ein?    | <input type="radio"/>            | <input checked="" type="radio"/> | <input type="radio"/>            | <input type="radio"/>            |
| Was verbindet die Hautzellen bei einer gesunden Hautbarriere miteinander? | <input type="radio"/>            | <input type="radio"/>            | <input checked="" type="radio"/> | <input type="radio"/>            |

## Frage 2.13

Lesen Sie bitte die nachfolgende Anleitung zum korrekten Gebrauch eines Asthma-Sprays.

Als erstes die Schutzkappe des Sprays entfernen.

Das Innere und Äußere sorgfältig prüfen, um sicherzugehen, dass das Mundstück sauber ist.

Den Inhalator vor der Anwendung für einige Sekunden gründlich schütteln.

Den Inhalator senkrecht mit dem Boden des Behältnisses nach oben halten.

Dabei befindet sich der Daumen unterhalb des Mundstücks.

Jetzt so lang wie möglich ausatmen, ohne dabei in das Mundstück zu atmen.

Das Mundstück zwischen den Zähnen in den Mund nehmen und fest mit den Lippen umschließen.

Tief und gleichmäßig durch das Mundrohr einatmen.

Kurz nach Beginn des Einatmens den Wirkstoffbehälter einmal fest nach unten drücken, um einen Sprühstoß abzugeben.

Währenddessen und auch danach weiter gleichmäßig und tief einatmen.

Den Atem anhalten, den Inhalator aus dem Mund nehmen und den Zeigefinger von dem Inhalator lösen.

Den Atem noch für einige Sekunden bzw. so lange wie möglich anhalten.

Nach der Anwendung das Mundstück immer mit der Schutzkappe verschließen, um Staub und Fusseln fernzuhalten

Lesen Sie bitte zuerst alle Begriffe durch. Bringen Sie danach die einzelnen Schritte gemäß dem Text in die korrekte Reihenfolge von Schritt 1 bis Schritt 5.

|                     | 1.                               | 2.                               | 3.                               | 4.                               | 5.                               |
|---------------------|----------------------------------|----------------------------------|----------------------------------|----------------------------------|----------------------------------|
| Ausatmen            | <input type="radio"/>            | <input checked="" type="radio"/> | <input type="radio"/>            | <input type="radio"/>            | <input type="radio"/>            |
| Atem anhalten       | <input type="radio"/>            | <input type="radio"/>            | <input type="radio"/>            | <input type="radio"/>            | <input checked="" type="radio"/> |
| Sprühstoß abgeben   | <input type="radio"/>            | <input type="radio"/>            | <input type="radio"/>            | <input checked="" type="radio"/> | <input type="radio"/>            |
| Einatmen            | <input type="radio"/>            | <input type="radio"/>            | <input checked="" type="radio"/> | <input type="radio"/>            | <input type="radio"/>            |
| Inhalator schütteln | <input checked="" type="radio"/> | <input type="radio"/>            | <input type="radio"/>            | <input type="radio"/>            | <input type="radio"/>            |

## Frage 2.14

Bei Neurodermitis handelt es sich um eine chronisch entzündliche, mit Juckreiz einhergehende Hauterkrankung.

Je nach Alter sind unterschiedliche Körperstellen betroffen.

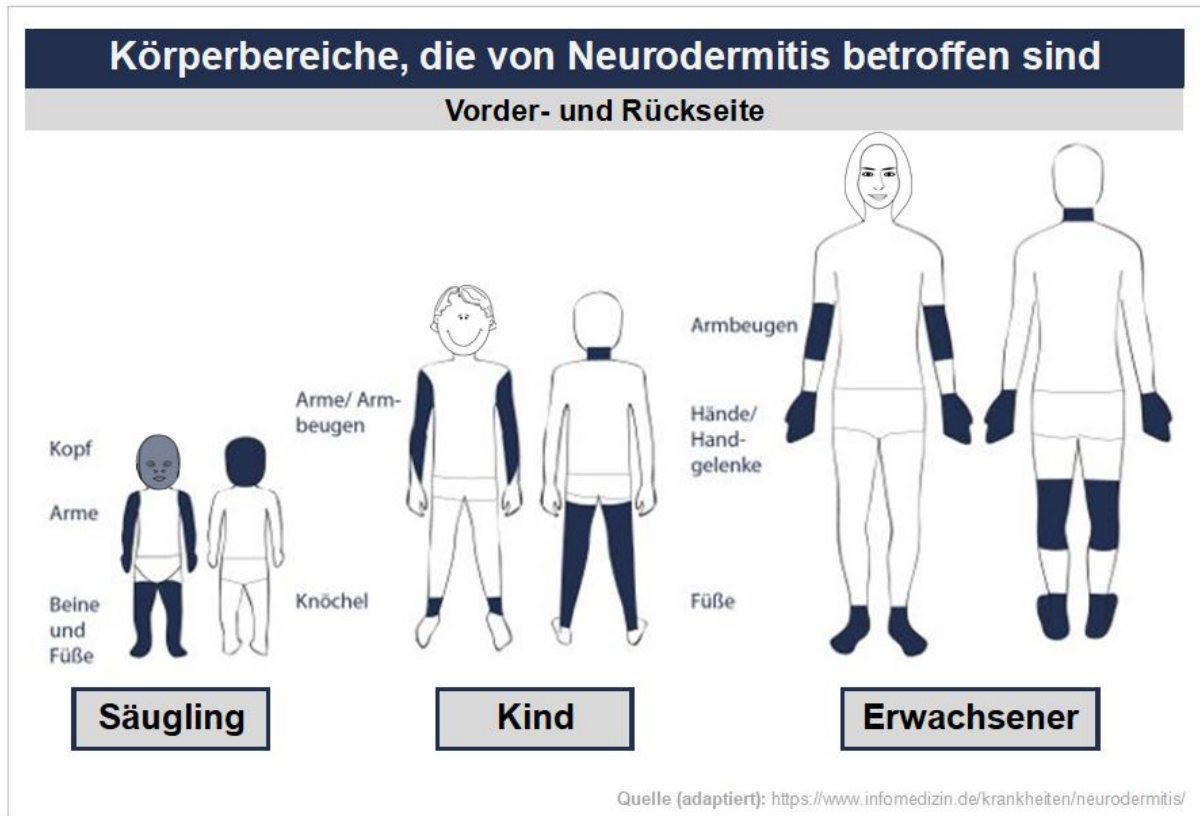

Geben Sie bitte an, für welches Alter die betroffenen Stellen typisch sind.

Pro Zeile kann mehr als ein Kreuz gesetzt werden.

| Häufig betroffene Stellen          | Säugling | Kind | Erwachsener |
|------------------------------------|----------|------|-------------|
| Arm Vorderseite oder Armbeugen     | X        | X    | X           |
| Bein Rückseite oder Beinbeugen     | ○        | X    | X           |
| Bein Vorderseite oder Knöchel/Füße | X        | X    | X           |
| Hände oder Handgelenke             | X        | ○    | X           |

**Noch zwei Fragen, dann haben Sie es geschafft!**

**Frage 2.15**

Die Mutter von Sophie (6 Monate) möchte das Allergierisiko für ihr Baby berechnen und hat dafür einen Test im Internet gefunden.

Die folgenden Informationen liegen zum Ausfüllen des Tests vor:

- Der Vater von Sophie hat Neurodermitis, die Mutter hat keine Allergie.
- Die Schwester von Sophie hat allergisches Asthma, der Bruder hat keine Allergie.
- In der Familie von Sophie gibt es zwei Katzen.
- Der Vater von Sophie ist Raucher und raucht in der Wohnung.
- Die Mutter ist Nicht-Raucherin.

**Im Folgenden zeigen wir Ihnen einzelne Teile aus dem Allergietest. Bitte tragen Sie anhand der Informationen aus dem Text bitte jeweils die entsprechende Punktzahl in das Kästchen ein. Verwenden Sie als Hilfestellung gerne einen Zettel und einen Stift.**

Welche Allergien haben Sie zurzeit oder hatten Sie früher?  
Bitte kreuzen Sie an!

|                       |                     |                       |
|-----------------------|---------------------|-----------------------|
| Mutter                |                     | Vater                 |
| <input type="radio"/> | Neurodermitis       | <input type="radio"/> |
| <input type="radio"/> | Heuschnupfen        | <input type="radio"/> |
| <input type="radio"/> | Allergisches Asthma | <input type="radio"/> |
|                       | Allergien auf:      |                       |
| <input type="radio"/> | Lebensmittel        | <input type="radio"/> |
| <input type="radio"/> | Schimmelpilze       | <input type="radio"/> |
| <input type="radio"/> | Tierhaare           | <input type="radio"/> |
| <input type="radio"/> | Hausstaubmilben     | <input type="radio"/> |
| <input type="radio"/> | Pollen              | <input type="radio"/> |

Punkte: \_\_\_\_\_ + \_\_\_\_\_ A

Bei einem oder mehreren Kreuzen pro Elternteil: je 5 Punkte.

Punkte:   5  

Wie viele Geschwister des Babys haben Allergien?  
Für jedes Kind mit Allergie: 3 Punkte.

Punkte:   3  

Gibt es Katzen in Ihrem Haushalt?  Ja  Nein  
Wenn Ja + bei Allergien in der Familie: 3 Punkte.

Punkte:   3

Wird in Ihrer Wohnung und/oder in Gegenwart von Mutter oder Kind geraucht?  Ja  Nein  
Wenn Ja + bei Allergien in der Familie: 5 Punkte.  
Wenn Ja, aber keine Allergien in der Familie: 1 Punkt.

Punkte:   5  

Rauchen Sie als Mutter in der Schwangerschaft und/oder Stillzeit?  Ja  Nein  
Wenn Ja + bei Allergien in der Familie: 5 Punkte.  
Wenn Ja, aber keine Allergien in der Familie: 1 Punkt.

Punkte:   0  

**Welcher Gesamtwert für das Allergierisiko ergibt sich, wenn Sie alle ermittelten Punkte zusammenzählen?**

**Gesamtpunktzahl Allergierisiko:   16**



**Und die letzte Frage:**

**Frage 2.16**

Die optimale Ernährung für Babys ist die Muttermilch. Muttermilch wird empfohlen, um Allergien bei Babys vorzubeugen. Es wird empfohlen, das Baby in den ersten vier Monaten voll zu stillen.

Falls ein ausschließliches Stillen des Babys in den ersten vier Monaten nicht möglich ist:

- wird für Kinder mit einer familiären Vorbelastung spezielle HA-Säuglingsnahrung empfohlen.
- für Kinder ohne erhöhtes Allergierisiko wird eine normale Säuglingsnahrung empfohlen.

Die Empfehlungen bei der Haustierhaltung lauten aktuell:

- Die Hundehaltung ist nicht mit einem höheren Allergierisiko verbunden.
- Für Katzen wird angenommen, dass ohne familiäre Vorbelastung generell keine Einschränkungen in der Haustierhaltung bestehen.
- Bei Kindern mit einem erhöhten Allergierisiko sollten Katzen im Haushalt vermieden werden.

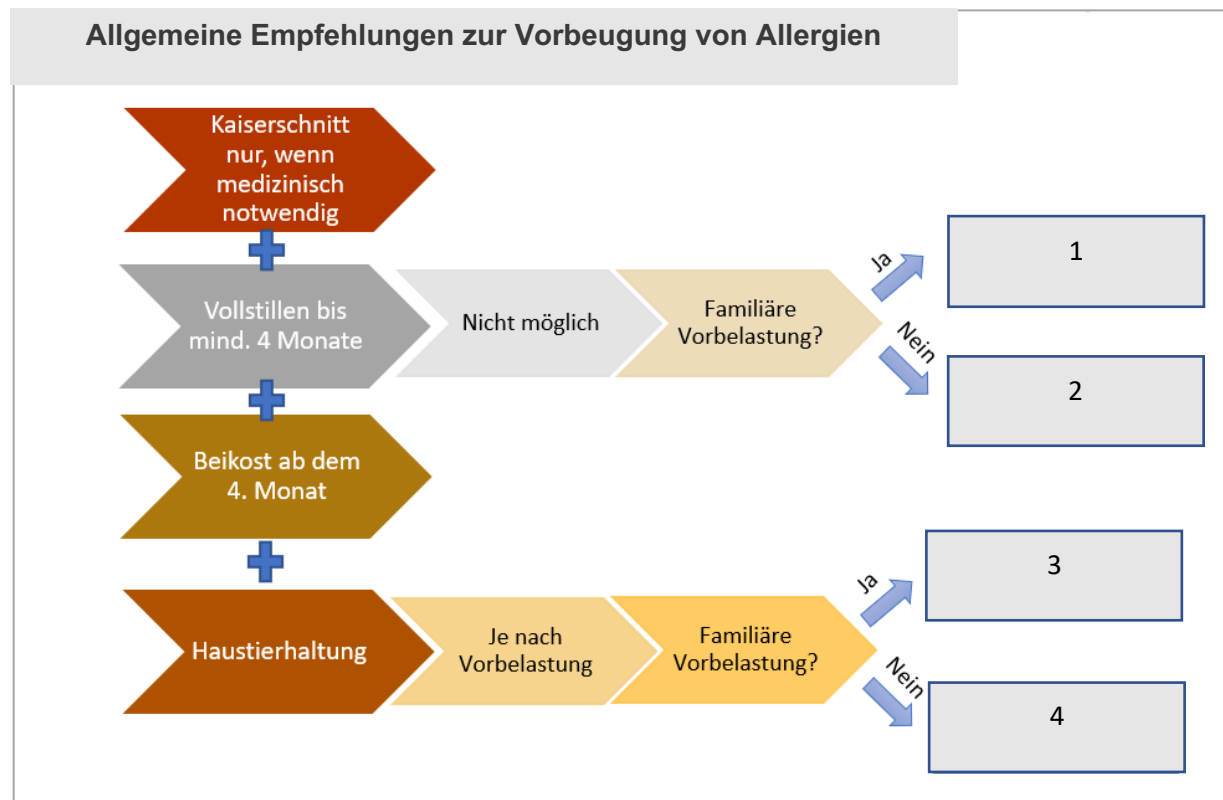

Lesen Sie bitte zunächst alle Begriffe durch. Geben Sie auf Basis des Textes an, welche Begriffe den nummerierten Kästchen (1 – 4) in der Abbildung zugeordnet werden können.

|                                               | 1                                   | 2                                   | 3                                   | 4                                   |
|-----------------------------------------------|-------------------------------------|-------------------------------------|-------------------------------------|-------------------------------------|
| Normale Säuglingsnahrung.                     | <input type="radio"/>               | <input checked="" type="checkbox"/> | <input type="radio"/>               | <input type="radio"/>               |
| Keine Einschränkungen in der Haustierhaltung. | <input type="radio"/>               | <input type="radio"/>               | <input type="radio"/>               | <input checked="" type="checkbox"/> |
| HA-Säuglingsnahrung.                          | <input checked="" type="checkbox"/> | <input type="radio"/>               | <input type="radio"/>               | <input type="radio"/>               |
| Kontakt mit Katzen vermeiden.                 | <input type="radio"/>               | <input type="radio"/>               | <input checked="" type="checkbox"/> | <input type="radio"/>               |
