# Supplementary material for: Use of Item Response Models in Assessing the Health Literacy Facet Understanding Health Information for Early Childhood Allergy Prevention and Prevention of COVID-19 Infections by Pregnant Women and Mothers of Infants
Source: Atypon-hosted journal article supplement (doi:10.1026/0012-1924/a000298), 2022-09-12
Supplement: 0012-1924_a000298_esm2.pdf [file 0012-1924_a000298_esm2.pdf]

## HELICAP- Lösungsblatt Testheft 2

### Frage 7.1

Das Schaubild zeigt den Verlauf einer Corona-Infektion.

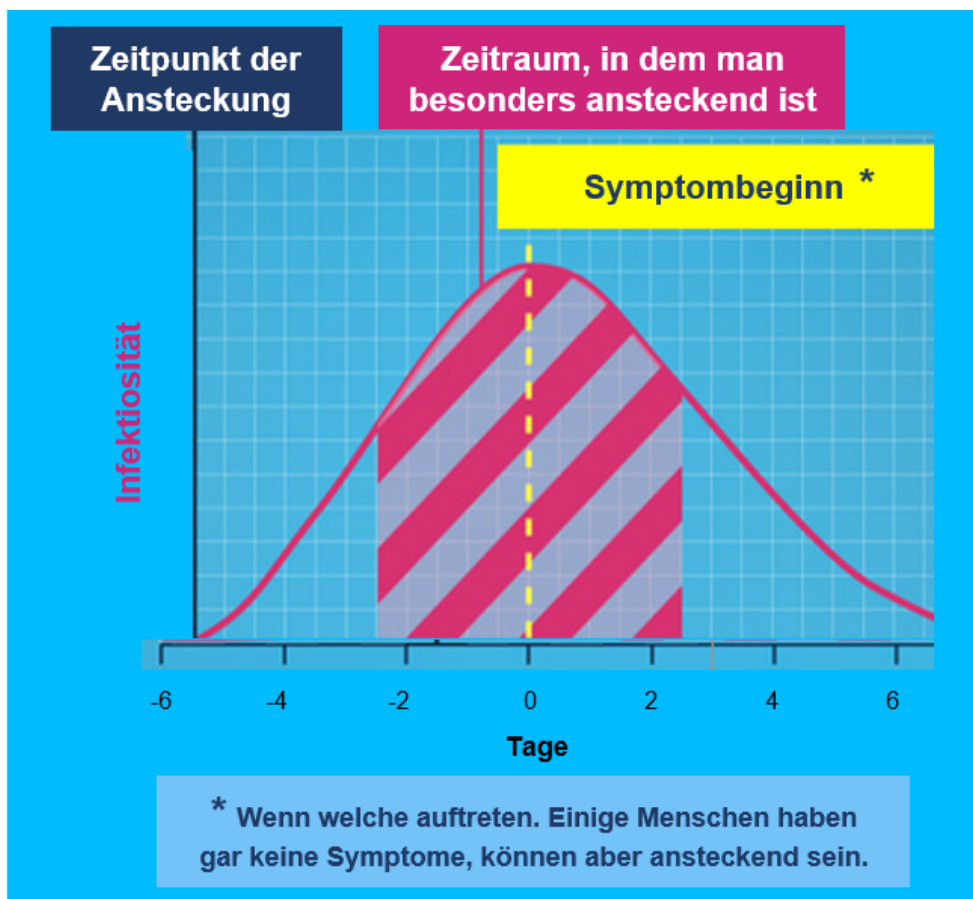

Sabine entwickelt an einem Sonntagabend COVID-19-typische Symptome. Der Corona Test am nächsten Tag fällt positiv aus.

Welche der Aussagen treffen zu, wenn man die Grafik betrachtet?

|                                                              | Trifft zu                        | Trifft nicht zu                  |
|--------------------------------------------------------------|----------------------------------|----------------------------------|
| Sie hat sich am ehesten am Donnerstag angesteckt.            | <input type="radio"/>            | <input checked="" type="radio"/> |
| Sie war bereits am Freitag ansteckend.                       | <input checked="" type="radio"/> | <input type="radio"/>            |
| Sechs Tage nach Symptombeginn ist sie nicht mehr ansteckend. | <input type="radio"/>            | <input checked="" type="radio"/> |

|                                                                                                     |                                  |                                  |
|-----------------------------------------------------------------------------------------------------|----------------------------------|----------------------------------|
| Die Ansteckung geschah am ehesten vor 4 Tagen.                                                      | <input type="radio"/>            | <input checked="" type="radio"/> |
| Es ist möglich, dass sie Personen, mit denen sie Freitag und Samstag Kontakt hatte, angesteckt hat. | <input checked="" type="radio"/> | <input type="radio"/>            |

## Frage 7.2

Der Text beschäftigt sich mit der Frage, ob und wann Desinfektionsmittel nützlich ist.

### „Brauche ich wirklich Desinfektionsmittel?“

Nicht unbedingt. Zwar lassen sich [...] Coronaviren [...] leicht von Oberflächen mit Desinfektionsmittel entfernen [...]. Dafür sollte man darauf achten, dass das Desinfektionsmittel zumindest als "begrenzt viruzid" ausgeschrieben ist. Doch gibt es auch sinnvolle Alternativen: Sich mit handelsüblicher Seife gründlich die Hände zu waschen hilft genauso effektiv gegen Coronaviren wie Desinfektionsmittel. Die in ihr enthaltenen Tenside schaden der Hülle des Virus und lösen es von der Haut ab.

Nach Ansicht von Melanie Brinkmann, Virologin am Helmholtz-Zentrum für Infektionsforschung, sind Desinfektionsmittel für viele Menschen im Alltag nur an bestimmten Stellen sinnvoll. Zum Beispiel "überall dort, wo viele Menschen nach Fahrten im öffentlichen Nahverkehr nicht sofort ihre Hände waschen können". Tatsächlich auf Desinfektionsmittel angewiesen sind hingegen Menschen, die Kontakt mit gefährdeten Personen oder bereits Infizierten haben, also Altenpfleger, Ärztinnen, Bundesfreiwilligendienstleistende oder Rettungskräfte. Hinzu kommen Haushalte, in denen chronisch Kranken leben, Menschen mit einem geschwächten Immunsystem und Diabetikerinnen und Diabetiker.“

Quelle: <https://www.zeit.de/wissen/gesundheit/2020-02/coronavirus-sars-cov-2-risiko-symptome-schutz-rechte-faq#brauche-ich-wirklich-desinfektionsmittel>

### Welche Aussagen treffen dem Text nach zu?

|                                                                                                                     | Trifft zu | Trifft nicht zu |
|---------------------------------------------------------------------------------------------------------------------|-----------|-----------------|
| Desinfektionsmittel sollte mit „begrenzt viruzid“ gekennzeichnet sein.                                              | X         | ○               |
| Hände waschen ist genauso effektiv gegen Coronaviren wie Desinfektionsmittel                                        | X         | ○               |
| Es macht keinen Unterschied, ob man die Hände mit oder ohne Seife wäscht.                                           | ○         | X               |
| Desinfektionsmittel ist für bestimmte Personengruppen wie medizinisches Personal oder chronische Patienten wichtig. | X         | ○               |

### Frage 7.3

Das Schaubild zeigt die Wirksamkeit einer AstraZeneca Impfung

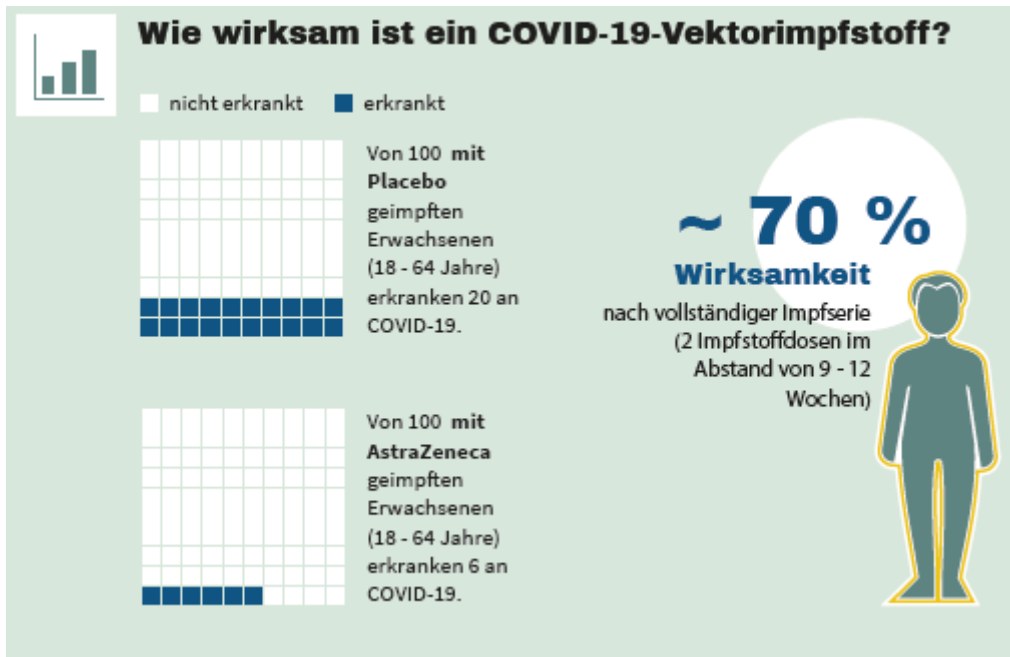

Wie viele Menschen wurden mit AstraZeneca geimpft?

\_\_\_ 100 \_\_\_

Wie viele Menschen erkrankten, die mit Placebo geimpft wurden?

\_\_\_ 20 \_\_\_

Wie viele Menschen erkrankten, die mit AstraZeneca geimpft wurden?

\_\_\_ 6 \_\_\_

Wie viele Menschen erkrankten aufgrund der AstraZeneca Impfung weniger?

\_\_\_ 14 \_\_\_

Wie viel Prozent erkrankten, obwohl sie mit AstraZeneca geimpft wurden?

\_\_\_ 6 \_\_\_ %

Wie viel Prozent erkrankten durch die AstraZeneca Impfung weniger als mit Placebo Impfung?

\_\_\_ 70 \_\_\_ %

## Frage 7.4

Die Abbildung zeigt das Szenario, wie sich das Infektionsgeschehen verhält, wenn ein Infizierter (rot) zwei weitere Menschen ansteckt, die dann wiederum zwei weitere Menschen anstecken.

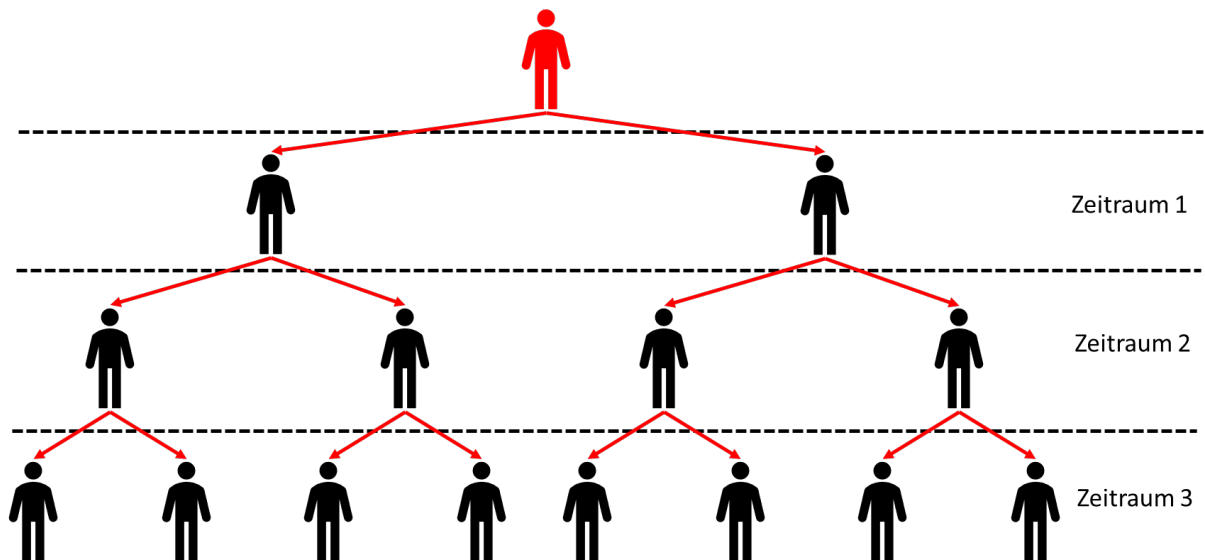

Wie viele Personen werden bis zu Zeitraum 2 angesteckt?   6  

Wie viele Personen werden in Zeitraum 3 zusätzlich angesteckt?   8  

Wie viele Personen werden bis zu Zeitraum 3 angesteckt?  14 

Wie viele Personen würden in einem vierten Zeitraum zusätzlich angesteckt werden?  16 

**Bitte schätzen Sie:**

|                                                                                                        | ca.<br>30             | ca.<br>60                        | ca.<br>90             | ca.<br>120            | ca.<br>150            | ca.<br>180            |
|--------------------------------------------------------------------------------------------------------|-----------------------|----------------------------------|-----------------------|-----------------------|-----------------------|-----------------------|
| Was schätzen Sie, wie viele Personen würden bis zu einem fünften Zeitraum insgesamt angesteckt werden? | <input type="radio"/> | <input checked="" type="radio"/> | <input type="radio"/> | <input type="radio"/> | <input type="radio"/> | <input type="radio"/> |

## Frage 7.5

Um die Ausbreitung und Gefährlichkeit von Krankheiten zu beschreiben, werden häufig folgende Begriffe verwendet:

- **Inzidenz** ist eine Maßzahl dafür, wie viele Menschen an einer bestimmten Krankheit neu erkranken.
- **Prävalenz** ist eine Maßzahl dafür, wie viele Menschen an einer bestimmten Krankheit erkrankt sind.
- **Mortalität** ist eine Maßzahl dafür, wie viele der Menschen in der Bevölkerung an einer bestimmten Krankheit sterben.
- **Letalität** ist eine Maßzahl dafür, wie viele der Menschen, die an einer bestimmten Krankheit erkrankt sind, an der Krankheit sterben.

Die Grundbegriffe werden in nachfolgender Abbildung grafisch dargestellt:

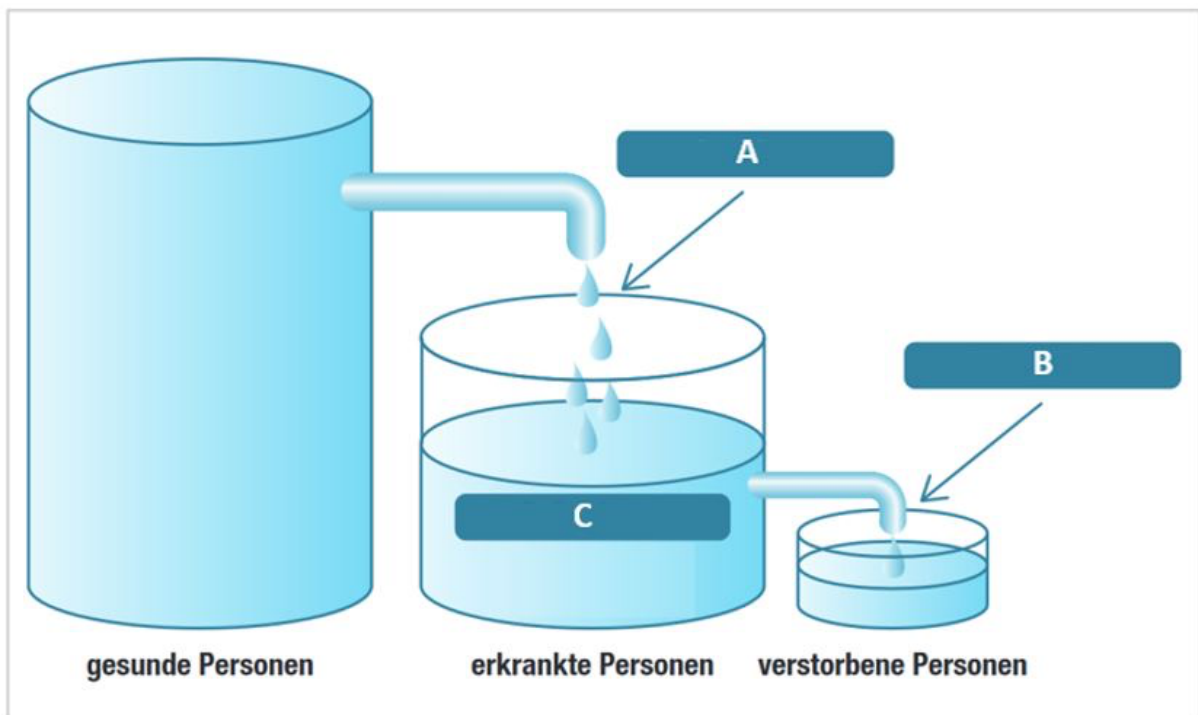

Ordnen Sie jedem Begriff den passenden Buchstaben (A, B, C) in der Abbildung zu  
(nur eine Antwort möglich).

|                   | A                        | B                        | C                        | Nicht in Grafik enthalten |
|-------------------|--------------------------|--------------------------|--------------------------|---------------------------|
| <b>Mortalität</b> | <input type="checkbox"/> | <input type="checkbox"/> | <input type="checkbox"/> | X                         |
| <b>Prävalenz</b>  | <input type="checkbox"/> | <input type="checkbox"/> | X                        | <input type="checkbox"/>  |
| <b>Inzidenz</b>   | X                        | <input type="checkbox"/> | <input type="checkbox"/> | <input type="checkbox"/>  |
| <b>Letalität</b>  | <input type="checkbox"/> | X                        | <input type="checkbox"/> | <input type="checkbox"/>  |

## Frage 7.6

Die Abbildung stellt dar, wie sich verschiedene Messwerte im Verlauf einer Corona Infektion verändern.

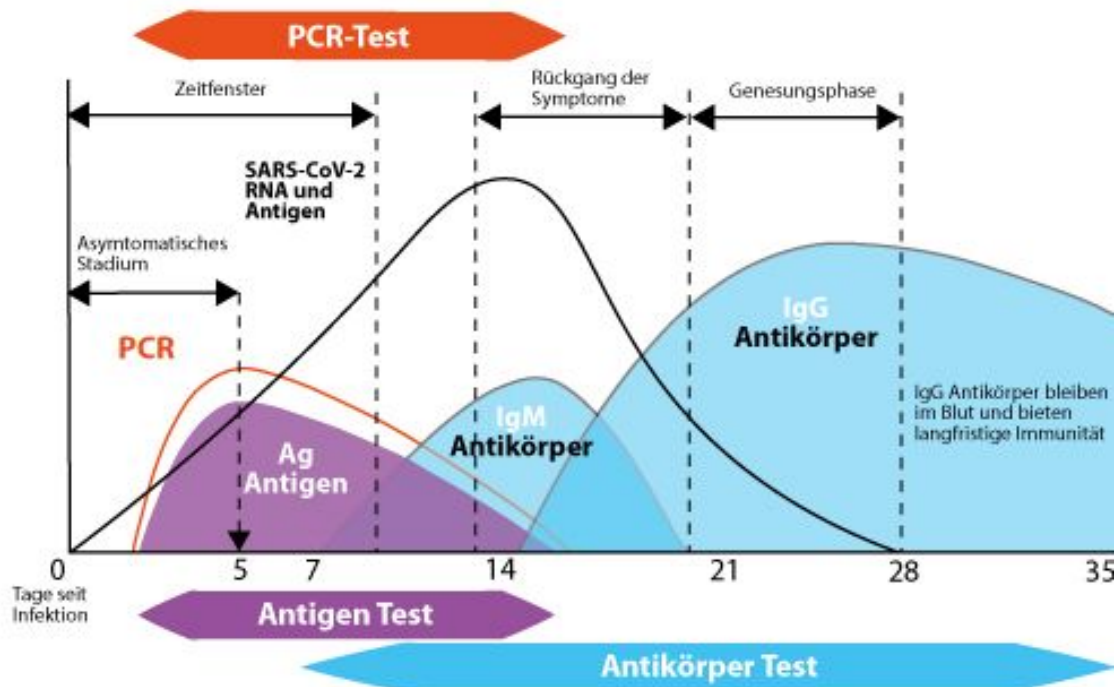

Lesen Sie die nachfolgenden Fälle durch. Geben Sie bitte an, welche Werte ermittelt werden müssen, um das jeweilige Ziel zu erreichen. (Mehrfachantworten möglich)

|                                                                                                                          | PCR-Wert | Antigen | IgM | IgG |
|--------------------------------------------------------------------------------------------------------------------------|----------|---------|-----|-----|
| Hanna möchte eine mögliche Erkrankung so früh wie möglich erkennen.                                                      | X        | ○       | ○   | ○   |
| Eine Forschungsgruppe möchte in der Bevölkerung feststellen, wie viele Menschen insgesamt infiziert sind oder waren.     | X        | X       | X   | X   |
| Max hatte vor vier Tagen Kontakt mit einer infizierten Person und möchte jetzt wissen, ob er sich angesteckt hat.        | X        | X       | ○   | ○   |
| Piet möchte erfahren, ob er immun gegen das Virus ist.                                                                   | ○        | ○       | ○   | X   |
| Evas Symptome lassen seit einem Tag nach und sie möchte wissen, welcher Wert derzeit die höchste Konzentration aufweist. | ○        | ○       | X   | ○   |



## Frage 7.7

Das Schaubild zeigt den Verlauf einer typischen Corona-Infektion.

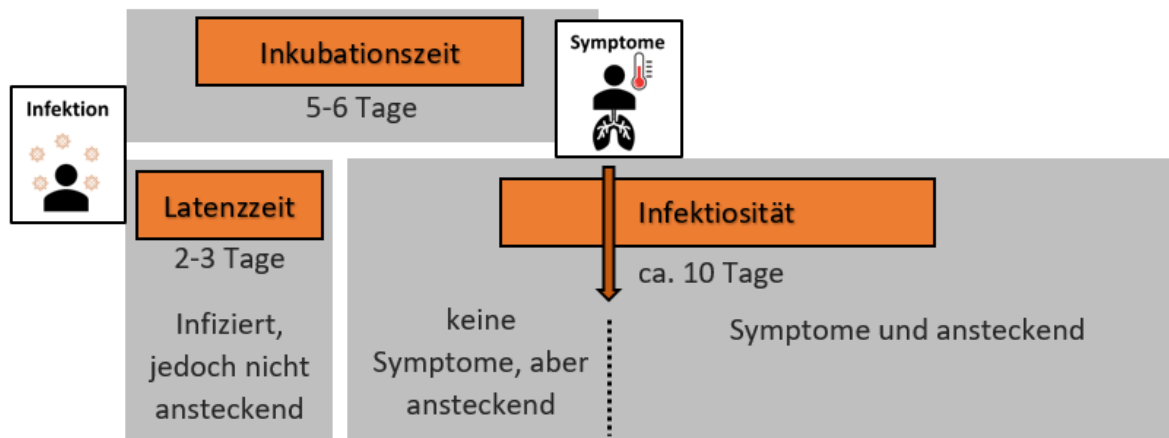

Ordnen Sie jeder Definition den passenden Begriff zu.

|                                                                                     | Inkubationszeit                     | Latenzzeit                          | Infektiosität                       | Keiner der angegebenen Begriffe     |
|-------------------------------------------------------------------------------------|-------------------------------------|-------------------------------------|-------------------------------------|-------------------------------------|
| Zeitraum zwischen Infektion und Symptome                                            | <input checked="" type="checkbox"/> | <input type="checkbox"/>            | <input type="checkbox"/>            | <input type="checkbox"/>            |
| Beginnt direkt nach der Latenzzeit                                                  | <input type="checkbox"/>            | <input type="checkbox"/>            | <input checked="" type="checkbox"/> | <input type="checkbox"/>            |
| Zeitraum von der Infektion bis zu dem Zeitpunkt, an dem man keine Symptome mehr hat | <input type="checkbox"/>            | <input type="checkbox"/>            | <input type="checkbox"/>            | <input checked="" type="checkbox"/> |
| Zeitraum, in dem man Symptome hat                                                   | <input type="checkbox"/>            | <input type="checkbox"/>            | <input type="checkbox"/>            | <input checked="" type="checkbox"/> |
| Zeitraum zwischen Infektion und Infektiosität                                       | <input type="checkbox"/>            | <input checked="" type="checkbox"/> | <input type="checkbox"/>            | <input type="checkbox"/>            |
| Zeitraum, in dem man ansteckend ist                                                 | <input type="checkbox"/>            | <input type="checkbox"/>            | <input checked="" type="checkbox"/> | <input type="checkbox"/>            |
| Zeitraum, in dem man keine Symptome hat, aber ansteckend ist                        | <input type="checkbox"/>            | <input type="checkbox"/>            | <input type="checkbox"/>            | <input checked="" type="checkbox"/> |

## Frage 7.8

### „Was sind die Gemeinsamkeiten von Covid-19 und Grippe (Influenza)?“

- [...] Beide Viren verursachen Atemwegserkrankungen, deren Verlauf sehr unterschiedlich sein kann - von symptomlos oder mild bis hin zu sehr schwer oder gar tödlich. [...]
- Bei Grippe und Covid-19 greifen die gleichen Vorsichtsmaßnahmen: sich regelmäßig und lange mit Seife die Hände waschen, in den Ellbogen oder ein Taschentuch niesen oder husten, Kontakt zu Infizierten vermeiden.

### Was unterscheidet Covid-19 von der Grippe?

- Die Zeit zwischen Ansteckung und Ausbildung erster Symptome (= Inkubationszeit) liegt bei der Influenza laut WHO bei drei Tagen. Beim Coronavirus liegt dieses Intervall bei etwa fünf bis sechs Tagen. Durch die lange Inkubationszeit kann Corona unbemerkt an mehr Menschen weitergegeben werden.
- Zudem scheint Corona ansteckender zu sein als Influenza. Nach WHO-Daten gibt ein Infizierter das Virus an zwei bis zweieinhalb weitere Menschen weiter. [...]
- [Die Infektiosität ist die Zeit, in der man ansteckend sein kann. Sie beginnt bei Influenza erst 4 bis 5 Tage nach Symptombeginn, bei Coronaviren beginnt sie mindestens zwei Tage vor Symptombeginn.]
- Schwere bis lebensbedrohliche Verläufe gibt es nach bisherigen Auswertungen bei Covid-19 häufiger als bei der Grippe. Etwa 15 von 100 Infizierten erkranken schwer. Wie hoch die Sterblichkeitsrate ist, lässt sich derzeit nicht seriös beantworten.“

Quelle: <https://www.mdr.de/brisant/corona-grippe-vergleich-100.html>

### Geben Sie bitte an, auf welche Erkrankung die Aussage zutrifft?

|                                                                                       | Corona                   | Grippe                              | Beides                              | Keines der beiden                   |
|---------------------------------------------------------------------------------------|--------------------------|-------------------------------------|-------------------------------------|-------------------------------------|
| Erst nach Symptombeginn ist man ansteckend.                                           | <input type="checkbox"/> | <input checked="" type="checkbox"/> | <input type="checkbox"/>            | <input type="checkbox"/>            |
| Die Zeit von der Ansteckung bis zum Auftreten von Symptomen dauert ein bis zwei Tage. | <input type="checkbox"/> | <input type="checkbox"/>            | <input type="checkbox"/>            | <input checked="" type="checkbox"/> |
| Es gibt schwere bis lebensbedrohliche Verläufe.                                       | <input type="checkbox"/> | <input type="checkbox"/>            | <input checked="" type="checkbox"/> | <input type="checkbox"/>            |
| Der Verlauf der Erkrankung kann mit und ohne Symptome sein.                           | <input type="checkbox"/> | <input type="checkbox"/>            | <input checked="" type="checkbox"/> | <input type="checkbox"/>            |

### Warum ist die Ansteckung bei einer Grippe leichter zu verhindern als bei Corona? (nur eine Antwort ankreuzen):

- Weil bei Grippe die Hygiene- und Abstandsregeln nicht so wirksam sind.
- Weil die Ansteckung erst nach Symptombeginn erfolgen kann.
- Weil das Immunsystem besser an Grippe gewöhnt ist.
- Weil Grippe weniger schwere Verläufe aufweist.
- Weil man sich besser auf Corona testen lassen kann.

## Frage 7.9

Die Abbildung zeigt, wie sich eine Person verhalten soll, die Kontakt mit einer infizierten Person oder einer Kontaktperson hatte.

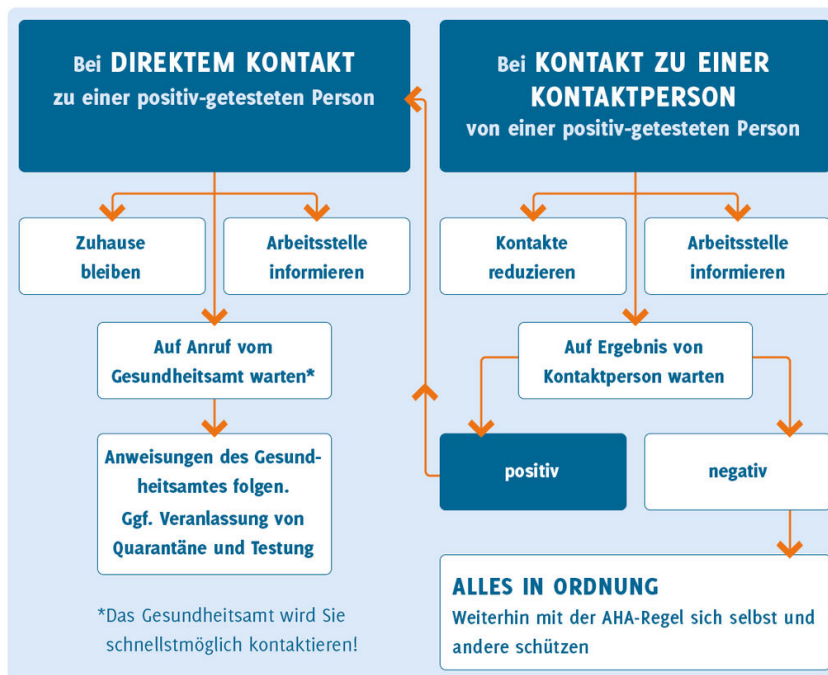

Cem und Marina hatten am Sonntag über einen längeren Zeitraum persönlichen Kontakt. Am Montag erfährt Cem, dass er am Freitag Kontakt zu einer infizierten Person hatte.

Wie sollen sich die beiden verhalten?

|                                       | Cem                      | Marina                   | Beide                    | Keiner                   |
|---------------------------------------|--------------------------|--------------------------|--------------------------|--------------------------|
| Auf Anruf vom Gesundheitsamt warten   | <b>X</b>                 | <input type="checkbox"/> | <input type="checkbox"/> | <input type="checkbox"/> |
| Zum Arzt gehen                        | <input type="checkbox"/> | <input type="checkbox"/> | <input type="checkbox"/> | <b>X</b>                 |
| Arbeitsstelle informieren             | <input type="checkbox"/> | <input type="checkbox"/> | <b>X</b>                 | <input type="checkbox"/> |
| Kontakte reduzieren                   | <input type="checkbox"/> | <b>X</b>                 | <input type="checkbox"/> | <input type="checkbox"/> |
| Auf Ergebnis von Kontaktperson warten | <input type="checkbox"/> | <b>X</b>                 | <input type="checkbox"/> | <input type="checkbox"/> |
| Gesundheitsamt anrufen                | <input type="checkbox"/> | <input type="checkbox"/> | <input type="checkbox"/> | <b>X</b>                 |
| Zuhause bleiben                       | <b>X</b>                 | <input type="checkbox"/> | <input type="checkbox"/> | <input type="checkbox"/> |

## Frage 7.10

Die Tabelle stellt die Eigenschaften vier verschiedener Corona-Impfstoffe gegenüber.

|                                                 | BioNTech/Pfizer | Moderna        | AstraZeneca   | Johnson&Johnson |
|-------------------------------------------------|-----------------|----------------|---------------|-----------------|
| <b>Impfstofftyp</b>                             | mRNA            |                | vektorbasiert |                 |
| <b>Altersempfehlung</b>                         | Ab 16 J.        | Ab 18 J.       | Ab 60 J.*     | Ab 60 J.*       |
| <b>Notwendige Anzahl an Impfungen</b>           | 2               |                |               | 1               |
| <b>Empfohlener Impfabstand</b>                  | 3 bis 6 Wochen  | 4 bis 6 Wochen | 12 Wochen     | Einzeldosis     |
| <b>Wirksamkeit</b>                              | Bis zu 95%      |                | Bis zu 80%    | Bis zu 70%      |
| <b>Schutz vor schweren Verläufen</b>            | 85%             | 100%           | 94%           | 85%             |
| <b>Voller Impfschutz (nach letzter Impfung)</b> | Ab Tag 7        | Ab Tag 14      | Ab Tag 15     | Ab Tag 28       |

\*Bei Personen von 18 bis 60 Jahren ist die Impfung nach ärztlicher Aufklärung und individueller Risikoakzeptanz möglich.

Ordnen Sie ein, welcher Impfstoff in den nachfolgenden Fällen am besten geeignet ist.

|                                                                                                                                | BioNTech/<br>Pfizer              | Moderna                          | Astra<br>Zeneca       | Johnson&<br>Johnson              |
|--------------------------------------------------------------------------------------------------------------------------------|----------------------------------|----------------------------------|-----------------------|----------------------------------|
| Anton ist 42 Jahre alt und legt großen Wert darauf, dass er nur einmal geimpft werden muss.                                    | <input type="radio"/>            | <input type="radio"/>            | <input type="radio"/> | <input checked="" type="radio"/> |
| Janine ist 25 und möchte sich so gut es geht vor schweren Verläufen schützen.                                                  | <input type="radio"/>            | <input checked="" type="radio"/> | <input type="radio"/> | <input type="radio"/>            |
| Julian ist 65 Jahre alt, möchte mit dem wirksamsten Impfstoff geimpft werden und schnellstmöglich den vollen Impfschutz haben. | <input checked="" type="radio"/> | <input type="radio"/>            | <input type="radio"/> | <input type="radio"/>            |
| Elias (33 Jahre) ist es wichtig, nach der ersten Impfung so schnell wie möglich die zweite Impfung zu erhalten.                | <input checked="" type="radio"/> | <input type="radio"/>            | <input type="radio"/> | <input type="radio"/>            |
| Silvia ist 17 Jahre alt und möchte sich impfen lassen.                                                                         | <input checked="" type="radio"/> | <input type="radio"/>            | <input type="radio"/> | <input type="radio"/>            |

## Frage 7.11

Das Schaubild verdeutlicht die biologische Funktionsweise einer vektorbasierten Impfung.

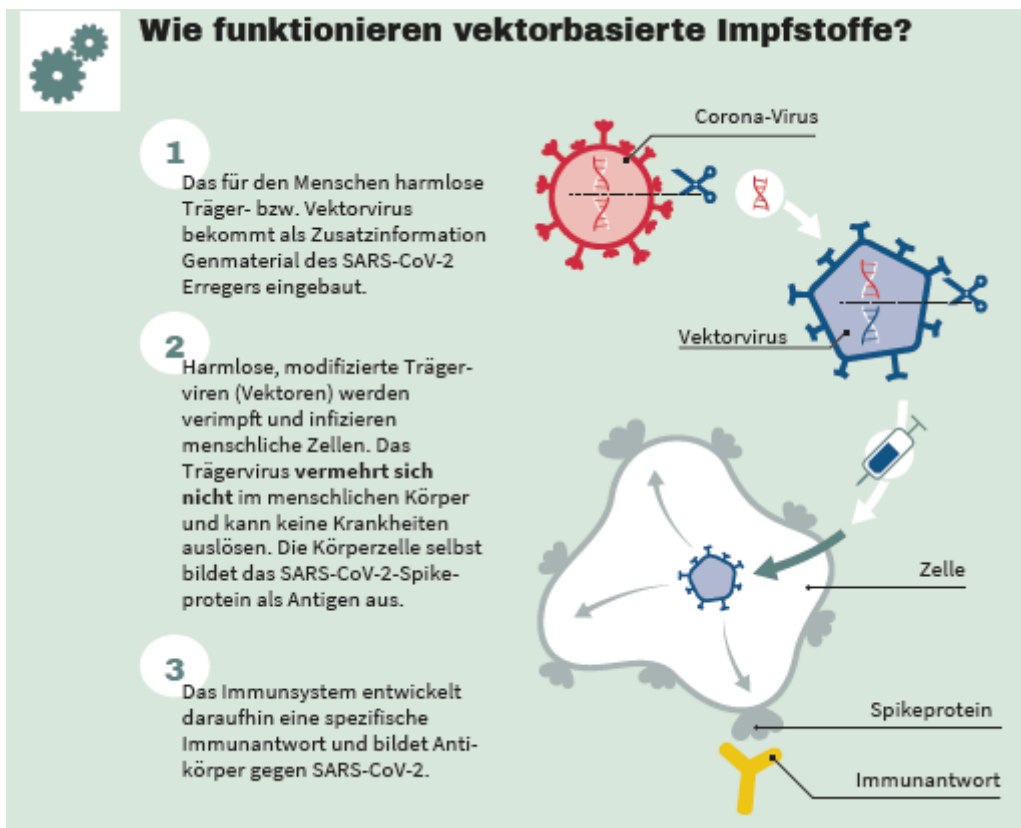

Bringen Sie die folgenden Schritte der Funktionsweise vektorbasierter Impfstoffe in eine Reihenfolge (1-6).

Bitte Zahl eintragen:

- |                                                       |                                 |
|-------------------------------------------------------|---------------------------------|
| Vektorvirus gelangt in Körperzelle                    | <input type="text" value="3."/> |
| Menschliche Zellen werden infiziert                   | <input type="text" value="4."/> |
| Bildung von Antikörpern                               | <input type="text" value="6."/> |
| In das Vektorvirus wird Genmaterial eingesetzt        | <input type="text" value="1."/> |
| Menschen werden mit modifizierten Trägerviren geimpft | <input type="text" value="2."/> |
| Bildung von Spikeproteinen                            | <input type="text" value="5."/> |

## Frage 7.12

Sie sehen drei Situationen, in denen eine Viruserkrankung von infizierten Personen auf andere Personen übertragen wird.

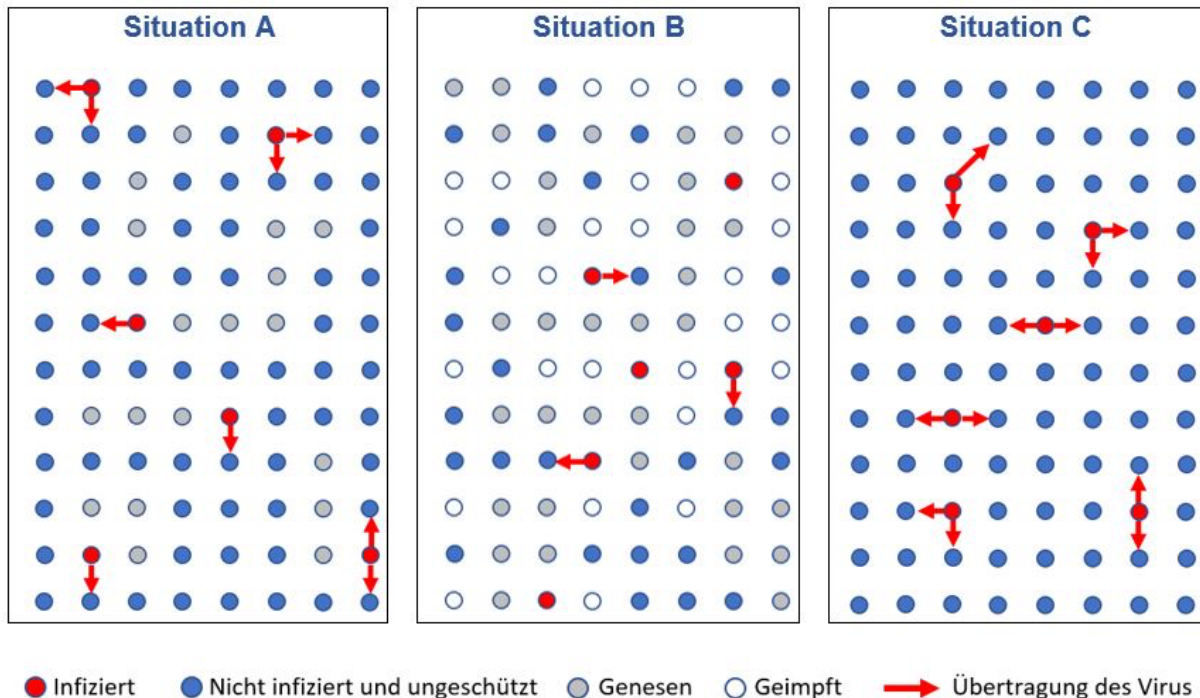

Aus der Grafik ist die Reproduktionszahl  $R$  abzuleiten.  $R$  ist die Anzahl an Personen, die im Durchschnitt von einer mit dem Corona-Virus infizierten Person angesteckt werden.

Zudem gilt:

- Wenn  $R$  größer 1, dann steigt die Anzahl der Neuinfektionen.
- Wenn  $R$  gleich 1, dann bleibt die Anzahl der Neuinfektionen konstant.
- Wenn  $R$  unter 1, dann sinkt die Anzahl der Neuinfektionen.

**Entscheiden Sie, wie sich die Anzahl der Neuinfektionen in den drei Situationen verhält.**

|             | steigt   | bleibt konstant | sinkt    |
|-------------|----------|-----------------|----------|
| Situation A | <b>X</b> | ○               | ○        |
| Situation B | ○        | ○               | <b>X</b> |
| Situation C | <b>X</b> | ○               | ○        |
