# Supplementary material for: Use of Item Response Models in Assessing the Health Literacy Facet Understanding Health Information for Early Childhood Allergy Prevention and Prevention of COVID-19 Infections by Pregnant Women and Mothers of Infants
Source: Atypon-hosted journal article supplement (doi:10.1026/0012-1924/a000298), 2022-09-12
Supplement: 0012-1924_a000298_esm4.pdf [file 0012-1924_a000298_esm4.pdf]

Electronic Supplement 4. Study sample characteristics ( $N = 343$ ).

|                                                                       | $M (SD) / [\text{Min, Median, Max}]$<br>or $N (\%)$ |
|-----------------------------------------------------------------------|-----------------------------------------------------|
| Age                                                                   | 32.15 (4.72) / [18, 32, 50]                         |
| Women with at least one child                                         | 281 (82 %)                                          |
| Number of children                                                    | 1.48 (0.85) / [0, 1, 5]                             |
| Age of youngest child in month                                        | 15.6 (10.94) / [0, 13, 50]                          |
| Pregnant women                                                        | 62 (18 %)                                           |
| Primipara                                                             | 170 (52.19)                                         |
| Subjective socioeconomic state <sup>a)</sup>                          | 5.87 (1.42) / [1, 6, 10]                            |
| Marital status                                                        |                                                     |
| Married                                                               | 240 (70 %)                                          |
| Single, but living with a steady partner                              | 87 (25 %)                                           |
| Single parent                                                         | 14 (4 %)                                            |
| Registered civil partnership                                          | 1 (0.3 %)                                           |
| Other                                                                 | 2 (0.6 %)                                           |
| Nationality: German                                                   | 331 (97 %)                                          |
| Mother tongue: German                                                 | 329 (96 %)                                          |
| School graduation                                                     |                                                     |
| University entrance qualification / High school diploma<br>(“Abitur“) | 156 (45 %)                                          |
| Advanced technical college entrance qualification                     | 27 (8 %)                                            |
| Secondary school diploma (“Mittlere Reife“)                           | 139 (41 %)                                          |
| Elementary school diploma (“Hauptschulabschluss“)                     | 15 (4 %)                                            |
| Other                                                                 | 6 (2 %)                                             |
| Occupation                                                            |                                                     |
| Employee                                                              | 227 (66 %)                                          |
| Civil servant                                                         | 26 (8 %)                                            |
| Worker                                                                | 24 (7 %)                                            |
| Vocational training / qualification                                   | 15 (4 %)                                            |
| Self-employed                                                         | 6 (2 %)                                             |
| University graduate in liberal professions                            | 7 (2 %)                                             |
| Other                                                                 | 38 (11 % <sup>valid</sup> )                         |
| COVID-19 vaccination state                                            |                                                     |
| Completely vaccinated                                                 | 221 (64 %)                                          |
| Second vaccination required                                           | 31 (9 %)                                            |
| No vaccination                                                        | 91 (27 %)                                           |
| Already infected with COVID-19 virus                                  | 25 (7 %)                                            |
| Severe COVID-19 progression in the personal environment               | 68 (20 %)                                           |

Notes: <sup>a)</sup> McArthur-Scale: 1 = low to 10 = high
