# Supplementary material for: Use of Item Response Models in Assessing the Health Literacy Facet Understanding Health Information for Early Childhood Allergy Prevention and Prevention of COVID-19 Infections by Pregnant Women and Mothers of Infants
Source: Atypon-hosted journal article supplement (doi:10.1026/0012-1924/a000298), 2022-09-12
Supplement: 0012-1924_a000298_esm5.pdf [file 0012-1924_a000298_esm5.pdf]

Electronic Supplement 5. Exploratory and confirmatory analysis of the 67 items on Understand Health Information.

| Dimensions                                                      |                                  |      | Deviance  | Par | AIC       | BIC       | <i>r</i>                         |
|-----------------------------------------------------------------|----------------------------------|------|-----------|-----|-----------|-----------|----------------------------------|
| Exploratory factor analysis (Software MPLUS, RML estimation)    |                                  |      |           |     |           |           |                                  |
| 1-Dim                                                           |                                  |      | 15,619.41 | 192 | 15,987.41 | 16,724.25 |                                  |
| 2-Dim                                                           |                                  |      | 15,489.81 | 258 | 16,005.82 | 16,995.95 |                                  |
| 3-Dim                                                           |                                  |      | 15,373.05 | 323 | 16,019.05 | 17,258.64 |                                  |
| Confirmatory IRT-Analysis (Software MPLUS, RML estimation)      |                                  |      |           |     |           |           |                                  |
| 1-Dim                                                           | Understanding                    | 2-pl | 15,606.62 | 192 | 15,990.62 | 16,727.46 |                                  |
|                                                                 |                                  | 1-pl | 15,807.52 | 126 | 16,059.41 | 16,542.97 |                                  |
| 2-Dim                                                           | GHP / ECAP vs. CIP <sup>a)</sup> | 2-pl | 15,597.03 | 193 | 15,983.03 | 16,723.71 | .930                             |
|                                                                 |                                  | 1-pl | 16,214.43 | 127 | 16,470.41 | 16,968.54 | .940                             |
|                                                                 | Calculate vs. Calc. not required | 2-pl | 15,606.64 | 193 | 15,992.65 | 16,733.33 | .997                             |
|                                                                 |                                  | 1-pl | 15,806.26 | 128 | 16,062.26 | 16,553.49 | .993                             |
| 3-Dim                                                           | GHP vs. ECAP vs. CIP             | 2-pl | 15,597.02 | 195 | 15,987.02 | 16,735.38 | .999 / .930 / .928 <sup>b)</sup> |
|                                                                 |                                  | 1-pl | 15,800.54 | 131 | 16,062.54 | 16,565.29 | .991 / .970 / .939 <sup>b)</sup> |
|                                                                 | Text vs. Graphic vs. Table       | 2-pl | 15,602.40 | 197 | 15,996.40 | 16,752.43 | .980, .985, 1.000 <sup>b)</sup>  |
|                                                                 |                                  | 1-pl | 15,809.78 | 131 | 16,071.78 | 16,574.52 | .981; .991; .998 <sup>b)</sup>   |
| Confirmatory IRT-Analysis (Software CONQUEST, MRCML estimation) |                                  |      |           |     |           |           |                                  |
| 1-Dim                                                           | Understanding                    | 1-pl | 15,817.37 | 126 | 16,069.37 | 16,552.93 |                                  |
| 2-Dim                                                           | GHP / ECAP vs. CIP               | 1-pl | 15,810.50 | 128 | 16,066.50 | 16,557.73 | .948                             |
| Final item pool (57 items)                                      |                                  |      |           |     |           |           |                                  |
| 1-Dim                                                           | Understanding                    | 1-pl | 12,097.60 | 100 | 12,297.60 | 12,681.37 |                                  |
| 2-Dim                                                           | GHP / ECAP vs. CIP               | 1-pl | 12,083.90 | 102 | 12,287.90 | 12,679.35 | .934                             |

Notes. <sup>a)</sup> GHP = General Health Prevention, ECAP = Early Childhood Allergy Prevention, CIP = COVID-19 infection prevention; <sup>b)</sup> Correlation 1-2, 1-3, 2-3.
